# Supplementary material for: A series of Zn(ii) and Cd(ii) coordination polymers based on flexible bis-[(pyridyl)-benzimidazole] ligand and different carboxylates: syntheses, structures, and photoluminescent properties
Source: Royal Society of Chemistry journal article supplement (doi:10.1039/c3ce00009e), 2013-01-01
Supplement: c3ce00009e.pdf [file c3ce00009e.pdf]

## **Electronic Supplementary Information**

**A series of Zn(II) and Cd(II) coordination polymers based on flexible bis-[(pyridyl)-benzimidazole] ligand and different carboxylates: syntheses, structures, and photoluminescent properties**

**Hai-Yan Liu,<sup>a,b</sup> Jian-Fang Ma,<sup>\*a</sup> Ying-Ying Liu<sup>a</sup> and Jin Yang<sup>\*a</sup>**

<sup>a</sup> *Key Lab for Polyoxometalate Science, Department of Chemistry, Northeast Normal University, Changchun 130024, People's Republic of China*

<sup>b</sup> *Department of Chemical Engineering, Yingkou University Zone, Yingkou 115014, People's Republic of China*

\* Correspondence authors

E-mail: jianfangma@yahoo.com.cn (J.-F. Ma)

Fax: +86-431-85098620 (J.-F. Ma)

E-mail: yangjinnenu@yahoo.com.cn (J. Yang)

**Table S1.** Selected bond distances (Å) and angles (°) for compounds **1-8**.

|                                              |            |                                              |            |
|----------------------------------------------|------------|----------------------------------------------|------------|
| <b>1</b>                                     |            |                                              |            |
| Zn(1)-O(1)                                   | 1.9089(18) | Zn(1)-O(3) <sup>#1</sup>                     | 1.9364(19) |
| Zn(1)-N(1)                                   | 2.036(2)   | Zn(1)-N(3) <sup>#2</sup>                     | 2.093(2)   |
| O(1)-Zn(1)-O(3) <sup>#1</sup>                | 105.65(9)  | O(1)-Zn(1)-N(1)                              | 122.60(9)  |
| O(3) <sup>#1</sup> -Zn(1)-N(1)               | 100.19(9)  | O(1)-Zn(1)-N(3) <sup>#2</sup>                | 112.55(9)  |
| O(3) <sup>#1</sup> -Zn(1)-N(3) <sup>#2</sup> | 117.04(9)  | N(1)-Zn(1)-N(3) <sup>#2</sup>                | 98.93(9)   |
| <b>2</b>                                     |            |                                              |            |
| Zn(1)-O(1)                                   | 1.927(2)   | Zn(1)-O(4) <sup>#1</sup>                     | 1.9316(19) |
| Zn(1)-N(1)                                   | 2.015(2)   | Zn(1)-N(3) <sup>#2</sup>                     | 2.086(3)   |
| O(1)-Zn(1)-O(4) <sup>#1</sup>                | 103.58(9)  | O(1)-Zn(1)-N(1)                              | 126.16(9)  |
| O(4) <sup>#1</sup> -Zn(1)-N(1)               | 99.61(9)   | O(1)-Zn(1)-N(3) <sup>#2</sup>                | 106.85(9)  |
| O(4) <sup>#1</sup> -Zn(1)-N(3) <sup>#2</sup> | 119.09(10) | N(1)-Zn(1)-N(3) <sup>#2</sup>                | 102.79(10) |
| <b>3</b>                                     |            |                                              |            |
| Zn(1)-O(5) <sup>#1</sup>                     | 1.940(3)   | Zn(1)-O(1)                                   | 1.958(3)   |
| Zn(1)-O(3)                                   | 1.982(3)   | Zn(1)-N(1)                                   | 2.001(4)   |
| Zn(2)-O(2)                                   | 2.035(3)   | Zn(2)-O(6) <sup>#1</sup>                     | 2.054(3)   |
| Zn(2)-O(3)                                   | 2.193(3)   |                                              |            |
| O(5) <sup>#1</sup> -Zn(1)-O(1)               | 111.97(15) | O(5) <sup>#1</sup> -Zn(1)-O(3)               | 112.03(13) |
| O(1)-Zn(1)-O(3)                              | 99.57(14)  | O(5) <sup>#1</sup> -Zn(1)-N(1)               | 109.09(16) |
| O(1)-Zn(1)-N(1)                              | 102.95(15) | O(3)-Zn(1)-N(1)                              | 120.38(15) |
| O(2)-Zn(2)-O(6) <sup>#1</sup>                | 84.78(13)  | O(2)-Zn(2)-O(6) <sup>#1</sup>                | 95.22(13)  |
| O(2)-Zn(2)-O(3) <sup>#2</sup>                | 89.64(12)  | O(6) <sup>#1</sup> -Zn(2)-O(3) <sup>#2</sup> | 89.84(12)  |
| O(2)-Zn(2)-O(3)                              | 90.36(12)  | O(6) <sup>#1</sup> -Zn(2)-O(3)               | 90.16(12)  |
| <b>4</b>                                     |            |                                              |            |
| Zn(1)-O(6) <sup>#1</sup>                     | 1.902(3)   | Zn(1)-O(2) <sup>#2</sup>                     | 1.932(3)   |
| Zn(1)-O(1)                                   | 1.978(3)   | Zn(1)-N(1)                                   | 2.040(3)   |
| Zn(2)-O(3)                                   | 1.942(3)   | Zn(2)-O(3) <sup>#3</sup>                     | 1.942(3)   |
| Zn(2)-O(1W)                                  | 2.021(5)   | Zn(2)-N(3) <sup>#4</sup>                     | 2.235(4)   |
| Zn(2)-N(3) <sup>#5</sup>                     | 2.235(4)   |                                              |            |
| O(6) <sup>#1</sup> -Zn(1)-O(2) <sup>#2</sup> | 128.26(17) | O(6) <sup>#1</sup> -Zn(1)-O(1)               | 100.41(16) |
| O(2) <sup>#2</sup> -Zn(1)-O(1)               | 114.17(15) | O(6) <sup>#1</sup> -Zn(1)-N(1)               | 104.90(15) |
| O(2) <sup>#2</sup> -Zn(1)-N(1)               | 100.13(13) | O(1)-Zn(1)-N(1)                              | 107.42(15) |
| O(3)-Zn(2)-O(3) <sup>#3</sup>                | 154.9(2)   | O(3)-Zn(2)-O(1W)                             | 102.53(12) |
| O(3) <sup>#3</sup> -Zn(2)-O(1W)              | 102.53(12) | O(3)-Zn(2)-N(3) <sup>#4</sup>                | 87.53(16)  |
| O(3) <sup>#3</sup> -Zn(2)-N(3) <sup>#4</sup> | 90.79(16)  | O(1W)-Zn(2)-N(3) <sup>#4</sup>               | 93.88(11)  |
| O(3)-Zn(2)-N(3) <sup>#5</sup>                | 90.79(16)  | O(3) <sup>#3</sup> -Zn(2)-N(3) <sup>#5</sup> | 87.53(16)  |

|                                              |            |                                              |            |
|----------------------------------------------|------------|----------------------------------------------|------------|
| O(1W)-Zn(2)-N(3) <sup>#5</sup>               | 93.88(11)  | N(3) <sup>#4</sup> -Zn(2)-N(3) <sup>#5</sup> | 172.2(2)   |
| <b>5</b>                                     |            |                                              |            |
| Cd(1)-N(1)                                   | 2.318(3)   | Cd(1)-O(2)                                   | 2.341(3)   |
| Cd(1)-N(3) <sup>#1</sup>                     | 2.373(3)   | Cd(1)-O(4) <sup>#2</sup>                     | 2.393(3)   |
| Cd(1)-O(1W)                                  | 2.439(3)   | Cd(1)-O(3) <sup>#2</sup>                     | 2.447(3)   |
| Cd(1)-O(1)                                   | 2.568(3)   |                                              |            |
| N(1)-Cd(1)-O(2)                              | 101.13(10) | N(1)-Cd(1)-N(3) <sup>#1</sup>                | 94.92(10)  |
| O(2)-Cd(1)-N(3) <sup>#1</sup>                | 131.89(12) | N(1)-Cd(1)-O(4) <sup>#2</sup>                | 104.07(11) |
| O(2)-Cd(1)-O(4) <sup>#2</sup>                | 133.41(10) | N(3) <sup>#1</sup> -Cd(1)-O(4) <sup>#2</sup> | 84.06(11)  |
| N(1)-Cd(1)-O(1W)                             | 171.42(13) | O(2)-Cd(1)-O(1W)                             | 81.32(10)  |
| N(3) <sup>#1</sup> -Cd(1)-O(1W)              | 77.56(11)  | O(4) <sup>#2</sup> -Cd(1)-O(1W)              | 79.49(12)  |
| N(1)-Cd(1)-O(3) <sup>#2</sup>                | 101.09(10) | O(2)-Cd(1)-O(3) <sup>#2</sup>                | 83.77(10)  |
| N(3) <sup>#1</sup> -Cd(1)-O(3) <sup>#2</sup> | 136.93(11) | O(4) <sup>#2</sup> -Cd(1)-O(3) <sup>#2</sup> | 53.39(9)   |
| O(1W)-Cd(1)-O(3) <sup>#2</sup>               | 87.31(11)  |                                              |            |
| <b>6</b>                                     |            |                                              |            |
| Cd(1)-O(1)                                   | 2.209(3)   | Cd(1)-O(3) <sup>#1</sup>                     | 2.329(4)   |
| Cd(1)-N(1)                                   | 2.334(4)   | Cd(1)-N(2) <sup>#2</sup>                     | 2.349(4)   |
| Cd(1)-O(4) <sup>#1</sup>                     | 2.486(4)   | Cd(1)-O(3) <sup>#3</sup>                     | 2.586(4)   |
| O(1)-Cd(1)-O(3) <sup>#1</sup>                | 120.27(13) | O(1)-Cd(1)-N(1)                              | 136.38(13) |
| O(3) <sup>#1</sup> -Cd(1)-N(1)               | 91.71(13)  | O(1)-Cd(1)-N(2) <sup>#2</sup>                | 110.20(13) |
| O(3) <sup>#1</sup> -Cd(1)-N(2) <sup>#2</sup> | 102.90(13) | N(1)-Cd(1)-N(2) <sup>#2</sup>                | 87.85(13)  |
| O(1)-Cd(1)-O(4) <sup>#1</sup>                | 80.93(13)  | O(3) <sup>#1</sup> -Cd(1)-O(4) <sup>#1</sup> | 53.91(12)  |
| N(1)-Cd(1)-O(4) <sup>#1</sup>                | 141.69(12) | N(2) <sup>#2</sup> -Cd(1)-O(4) <sup>#1</sup> | 84.77(14)  |
| O(1)-Cd(1)-O(3) <sup>#3</sup>                | 74.55(13)  | O(3) <sup>#1</sup> -Cd(1)-O(3) <sup>#3</sup> | 81.55(12)  |
| N(1)-Cd(1)-O(3) <sup>#3</sup>                | 82.70(12)  | N(2) <sup>#2</sup> -Cd(1)-O(3) <sup>#3</sup> | 169.70(12) |
| O(4) <sup>#1</sup> -Cd(1)-O(3) <sup>#3</sup> | 105.21(12) |                                              |            |
| <b>7</b>                                     |            |                                              |            |
| Cd(1)-O(2)                                   | 2.217(2)   | Cd(1)-O(3) <sup>#1</sup>                     | 2.290(2)   |
| Cd(1)-N(1)                                   | 2.340(2)   | Cd(1)-N(2) <sup>#2</sup>                     | 2.444(2)   |
| Cd(1)-O(4) <sup>#1</sup>                     | 2.463(2)   | Cd(1)-O(1) <sup>#3</sup>                     | 2.465(2)   |
| O(2)-Cd(1)-O(3) <sup>#1</sup>                | 96.31(9)   | O(2)-Cd(1)-N(1)                              | 124.17(9)  |
| O(3) <sup>#1</sup> -Cd(1)-N(1)               | 138.90(9)  | O(2)-Cd(1)-N(2) <sup>#2</sup>                | 89.28(9)   |
| O(3) <sup>#1</sup> -Cd(1)-N(2) <sup>#2</sup> | 96.35(9)   | N(1)-Cd(1)-N(2) <sup>#2</sup>                | 91.41(8)   |
| O(2)-Cd(1)-O(4) <sup>#1</sup>                | 150.15(8)  | O(3) <sup>#1</sup> -Cd(1)-O(4) <sup>#1</sup> | 54.71(8)   |
| N(1)-Cd(1)-O(4) <sup>#1</sup>                | 85.58(8)   | N(2) <sup>#2</sup> -Cd(1)-O(4) <sup>#1</sup> | 87.38(9)   |
| O(2)-Cd(1)-O(1) <sup>#3</sup>                | 90.84(8)   | O(3) <sup>#1</sup> -Cd(1)-O(1) <sup>#3</sup> | 81.22(8)   |
| N(1)-Cd(1)-O(1) <sup>#3</sup>                | 90.53(8)   | N(2) <sup>#2</sup> -Cd(1)-O(1) <sup>#3</sup> | 177.56(8)  |

|                                               |           |                                                |           |
|-----------------------------------------------|-----------|------------------------------------------------|-----------|
| O(4) <sup>#1</sup> -Cd(1)-O(1) <sup>#3</sup>  | 91.30(8)  |                                                |           |
| <b>8</b>                                      |           |                                                |           |
| Cd(1)-O(1)                                    | 2.207(7)  | Cd(1)-N(1)                                     | 2.283(9)  |
| Cd(1)-N(3) <sup>#1</sup>                      | 2.335(7)  | Cd(1)-O(3) <sup>#2</sup>                       | 2.377(8)  |
| Cd(1)-O(4') <sup>#2</sup>                     | 2.388(18) | Cd(1)-O(4) <sup>#2</sup>                       | 2.399(16) |
| Cd(1)-O(1')                                   | 2.45(3)   | Cd(1)-O(3') <sup>#2</sup>                      | 2.45(3)   |
| Cd(1)-O(2)                                    | 2.460(7)  | Cd(1)-O(2')                                    | 2.46(4)   |
| O(1)-Cd(1)-N(1)                               | 136.4(4)  | O(1)-Cd(1)-N(3) <sup>#1</sup>                  | 97.7(4)   |
| N(1)-Cd(1)-N(3) <sup>#1</sup>                 | 104.6(2)  | O(1)-Cd(1)-O(3) <sup>#2</sup>                  | 96.3(4)   |
| N(1)-Cd(1)-O(3) <sup>#2</sup>                 | 93.9(3)   | N(3) <sup>#1</sup> -Cd(1)-O(3) <sup>#2</sup>   | 134.8(4)  |
| O(1)-Cd(1)-O(4') <sup>#2</sup>                | 93.5(6)   | N(1)-Cd(1)-O(4') <sup>#2</sup>                 | 124.3(5)  |
| N(3) <sup>#1</sup> -Cd(1)-O(4') <sup>#2</sup> | 86.8(5)   | O(3) <sup>#2</sup> -Cd(1)-O(4') <sup>#2</sup>  | 49.5(6)   |
| O(1)-Cd(1)-O(4) <sup>#2</sup>                 | 112.3(5)  | N(1)-Cd(1)-O(4) <sup>#2</sup>                  | 107.6(5)  |
| N(3) <sup>#1</sup> -Cd(1)-O(4) <sup>#2</sup>  | 82.2(5)   | O(3) <sup>#2</sup> -Cd(1)-O(4) <sup>#2</sup>   | 52.7(5)   |
| O(4') <sup>#2</sup> -Cd(1)-O(4) <sup>#2</sup> | 18.9(5)   | N(1)-Cd(1)-O(1')                               | 106.9(7)  |
| N(3) <sup>#1</sup> -Cd(1)-O(1')               | 123.9(7)  | O(3) <sup>#2</sup> -Cd(1)-O(1')                | 87.7(7)   |
| O(4) <sup>#2</sup> -Cd(1)-O(1')               | 128.2(8)  | O(1)-Cd(1)-O(3') <sup>#2</sup>                 | 120.1(8)  |
| N(1)-Cd(1)-O(3') <sup>#2</sup>                | 80.1(7)   | N(3) <sup>#1</sup> -Cd(1)-O(3') <sup>#2</sup>  | 119.4(7)  |
| O(3) <sup>#2</sup> -Cd(1)-O(3') <sup>#2</sup> | 24.5(7)   | O(4') <sup>#2</sup> -Cd(1)-O(3') <sup>#2</sup> | 48.8(4)   |
| O(4) <sup>#2</sup> -Cd(1)-O(3') <sup>#2</sup> | 41.7(8)   | O(1')-Cd(1)-O(3') <sup>#2</sup>                | 111.0(10) |
| O(1)-Cd(1)-O(2)                               | 51.7(3)   | N(1)-Cd(1)-O(2)                                | 92.1(4)   |
| N(3) <sup>#1</sup> -Cd(1)-O(2)                | 87.3(4)   | O(3) <sup>#2</sup> -Cd(1)-O(2)                 | 133.6(5)  |
| O(4') <sup>#2</sup> -Cd(1)-O(2)               | 143.4(6)  | O(4) <sup>#2</sup> -Cd(1)-O(2)                 | 159.5(6)  |
| O(1')-Cd(1)-O(2)                              | 46.8(7)   | O(3') <sup>#2</sup> -Cd(1)-O(2)                | 153.3(8)  |
| O(1)-Cd(1)-O(2')                              | 41.1(15)  | N(1)-Cd(1)-O(2')                               | 110.9(13) |
| N(3) <sup>#1</sup> -Cd(1)-O(2')               | 74.3(11)  | O(3) <sup>#2</sup> -Cd(1)-O(2')                | 136.2(14) |
| O(4') <sup>#2</sup> -Cd(1)-O(2')              | 124.5(13) | O(4) <sup>#2</sup> -Cd(1)-O(2')                | 138.7(11) |
| O(1')-Cd(1)-O(2')                             | 51.4(14)  | O(3') <sup>#2</sup> -Cd(1)-O(2')               | 160.7(17) |

Symmetry codes for **1**: <sup>#1</sup> x+1/2, -y+1/2, z+1/2; <sup>#2</sup> -x+1, -y, -z+1. For **2**: <sup>#1</sup> x, -y+1/2, z-1/2; <sup>#2</sup> -x+1, -y, -z. For **3**: <sup>#1</sup> x, -y-1/2, z+1/2; <sup>#2</sup> -x+1, -y, -z+2; <sup>#3</sup> -x+1, y+1/2, -z+3/2. For **4**: <sup>#1</sup> -x, y, -z+1/2; <sup>#2</sup> -x, -y+1, -z; <sup>#3</sup> -x+1/2, -y+2, z; <sup>#4</sup> -x, y+1, -z+1/2; <sup>#5</sup> x+1/2, -y+1, -z+1/2. For **5**: <sup>#1</sup> -x+1, -y+1, -z+1; <sup>#2</sup> -x+1, -y+1, -z. For **6**: <sup>#1</sup> x, y+1, z; <sup>#2</sup> -x+1, -y+1, -z+2; <sup>#3</sup> -x+2, -y, -z+2. For **7**: <sup>#1</sup> -x, y+1/2, -z+1/2; <sup>#2</sup> -x+1, -y, -z; <sup>#3</sup> -x, -y, -z. For **8**: <sup>#1</sup> -x+1/2, -y+1/2, -z; <sup>#2</sup> -x+3/2, -y+1/2, -z.

**Table S2.** Hydrogen-bonding parameters for **2-5** (in Å and deg)

| D-H···A | d(D-H) | d(D···A) | ∠(D-H···A) |
|---------|--------|----------|------------|
|---------|--------|----------|------------|

---

|                                  |           |           |           |        |
|----------------------------------|-----------|-----------|-----------|--------|
| <b>2</b>                         |           |           |           |        |
| N(4)-H(4B)...O(2) <sup>#3</sup>  | 0.844(10) | 2.004(16) | 2.776(3)  | 152(2) |
| <b>3</b>                         |           |           |           |        |
| O(1W)-H(1A)...O(2W)              | 0.762(18) | 2.26(3)   | 2.916(13) | 145(3) |
| O(2W)-H(2A)...O(1W)              | 0.86(2)   | 2.59(4)   | 2.916(13) | 104(3) |
| <b>4</b>                         |           |           |           |        |
| O(1W)-H(1A)...O(2W)              | 0.869(10) | 2.12(4)   | 2.703(7)  | 124(4) |
| <b>5</b>                         |           |           |           |        |
| O(1W)-H(1B)...O(2) <sup>#2</sup> | 0.860(19) | 2.16(4)   | 2.844(5)  | 136(5) |
| O(1W)-H(1A)...O(3)               | 0.863(19) | 1.95(3)   | 2.706(5)  | 146(5) |

---

Symmetry codes for **2**: <sup>#3</sup> -x, y+1/2, -z+1/2. For **5**: <sup>#2</sup> -x+1, -y+1, -z.

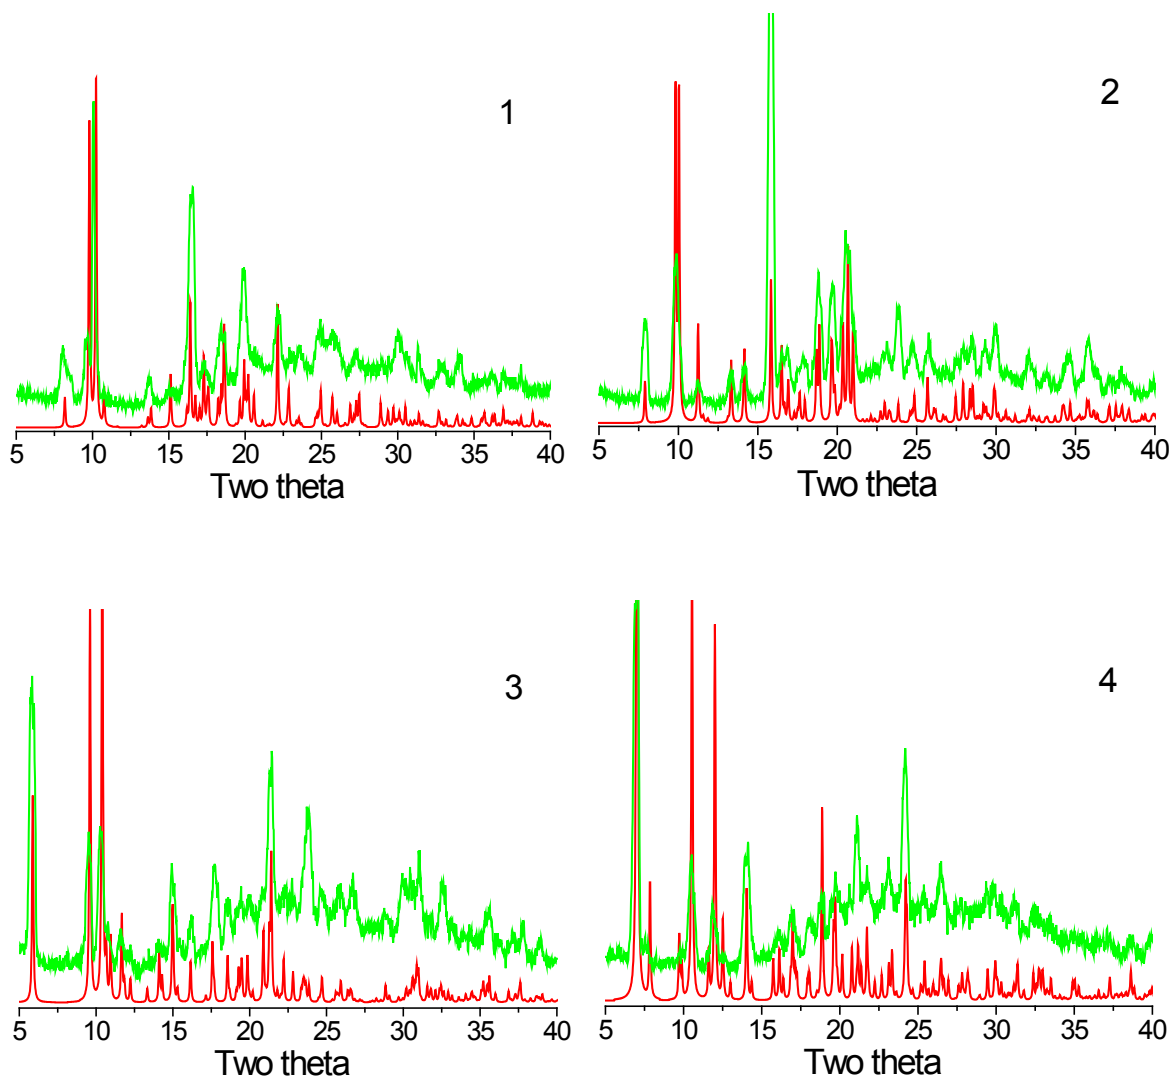

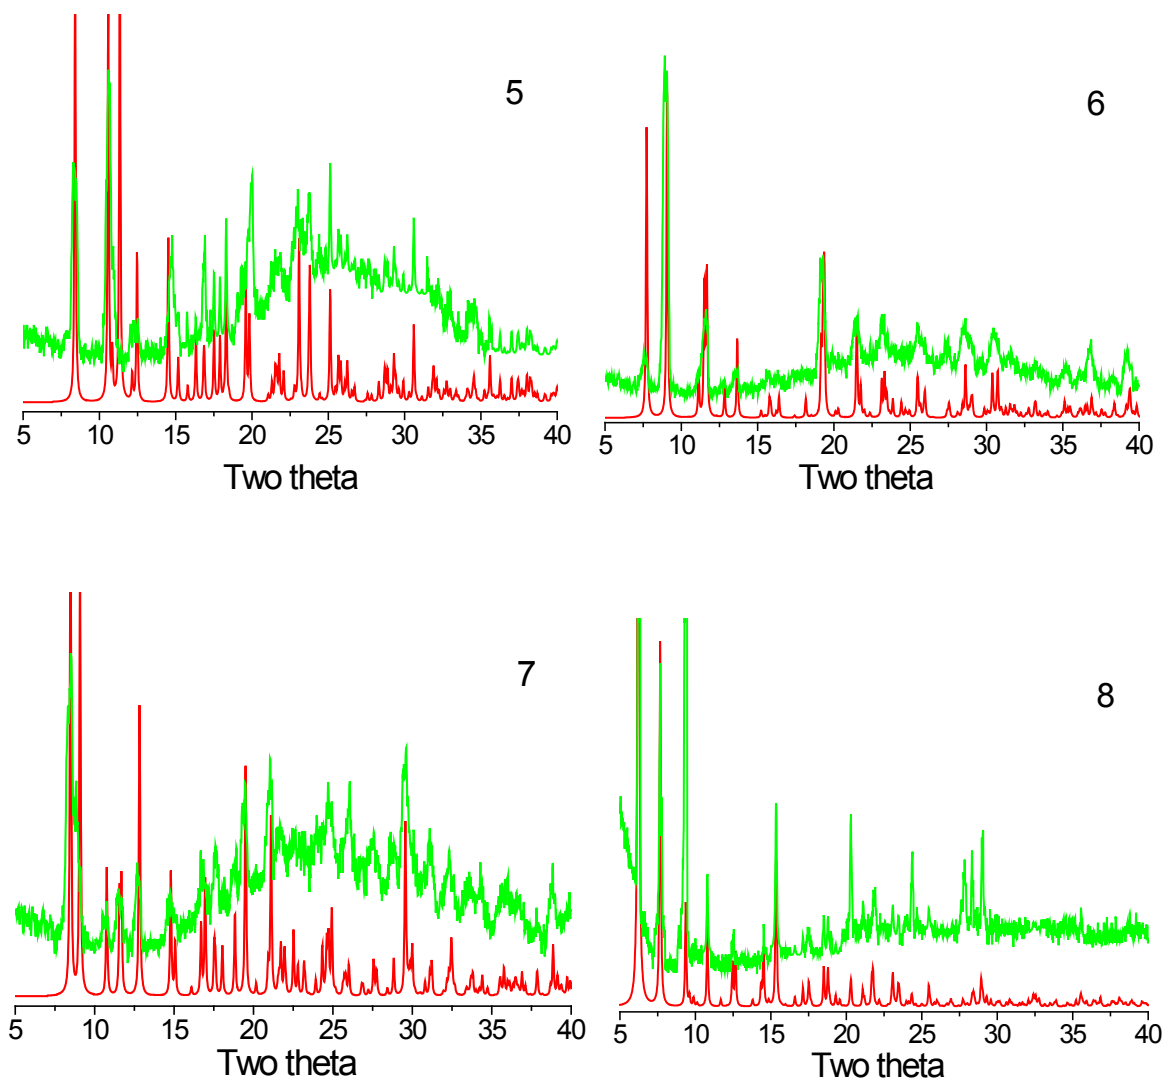

**Fig. S1** The simulated (green) and experimental (red) XRPD patterns for the compounds **1-8** (the diffraction peaks of both simulated and experimental patterns match well in relevant positions, indicating that the phase purities of compounds **1-8** are good).

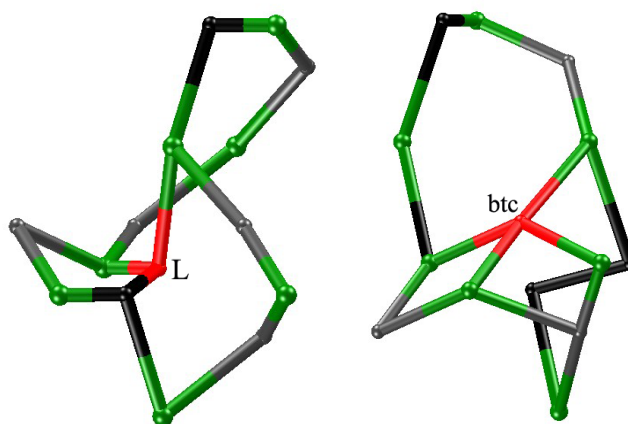

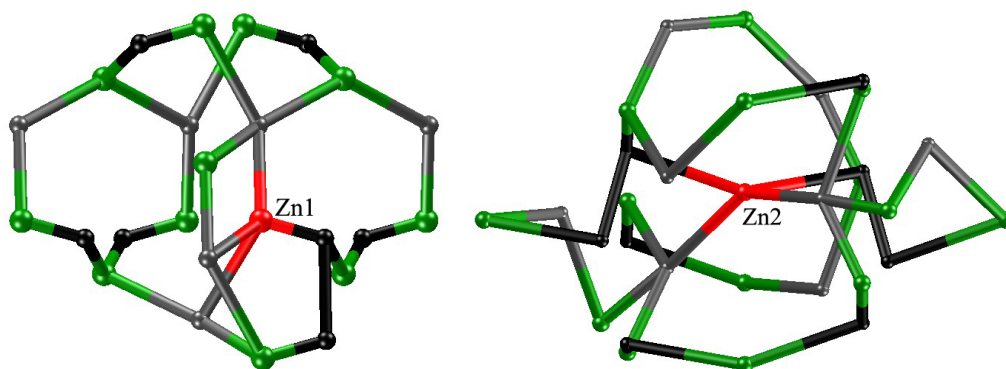

**Fig. S2.** View of the 3- and 4-connected nodes of **4**.

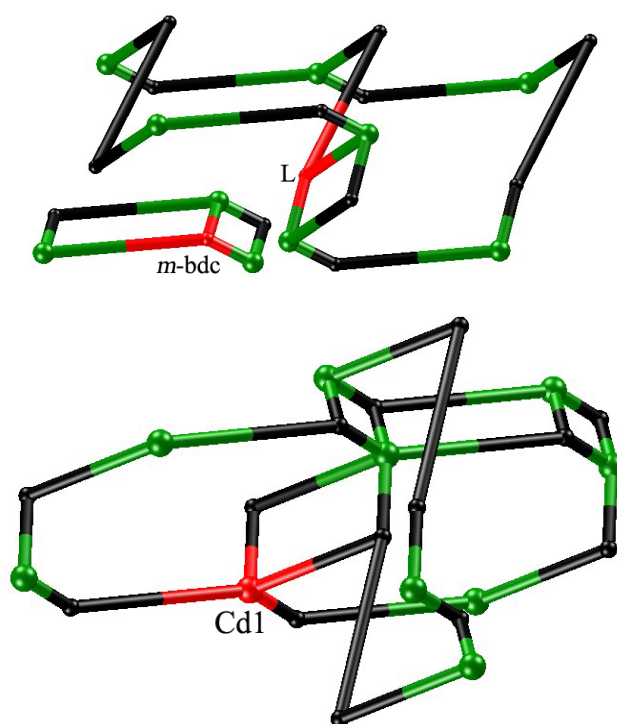

**Fig. S3.** View of the 3- and 4-connected nodes of **6**.

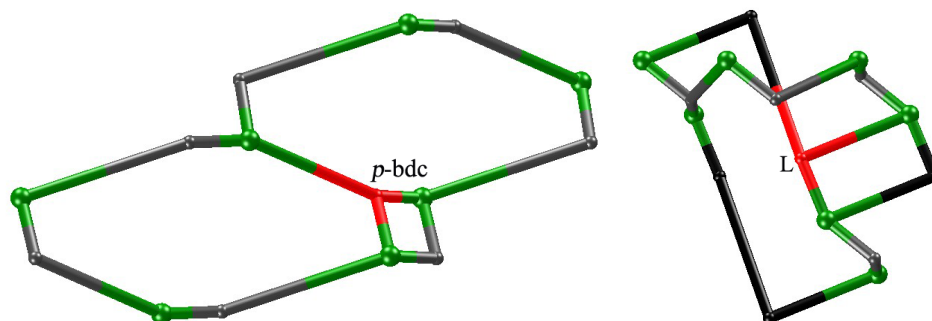

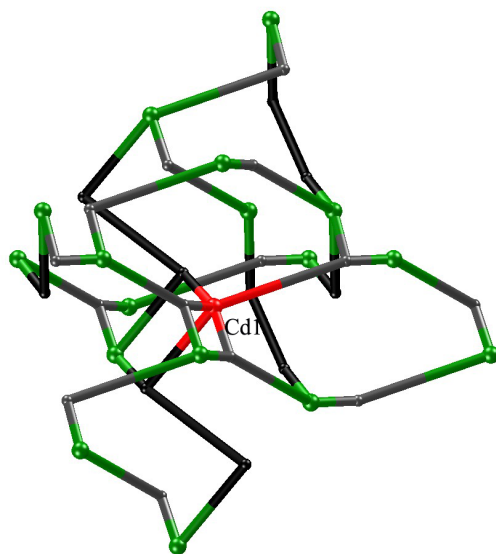

**Fig. S4.** View of the 3- and 5-connected nodes of **7**.

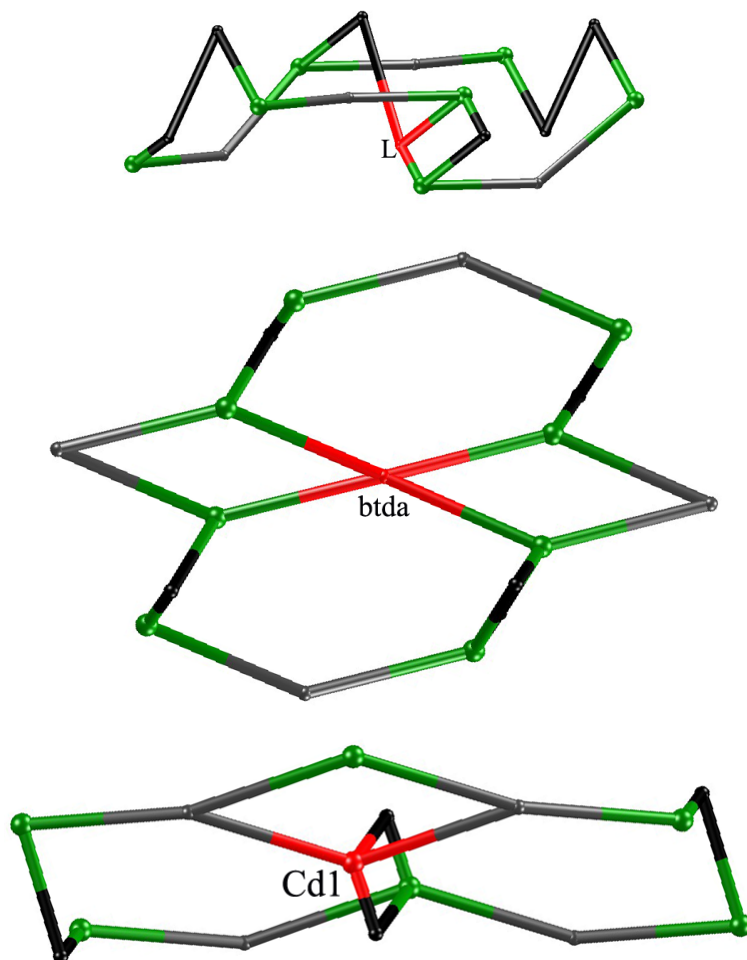

**Fig. S5.** View of the 3- and 4-connected nodes of **8**.



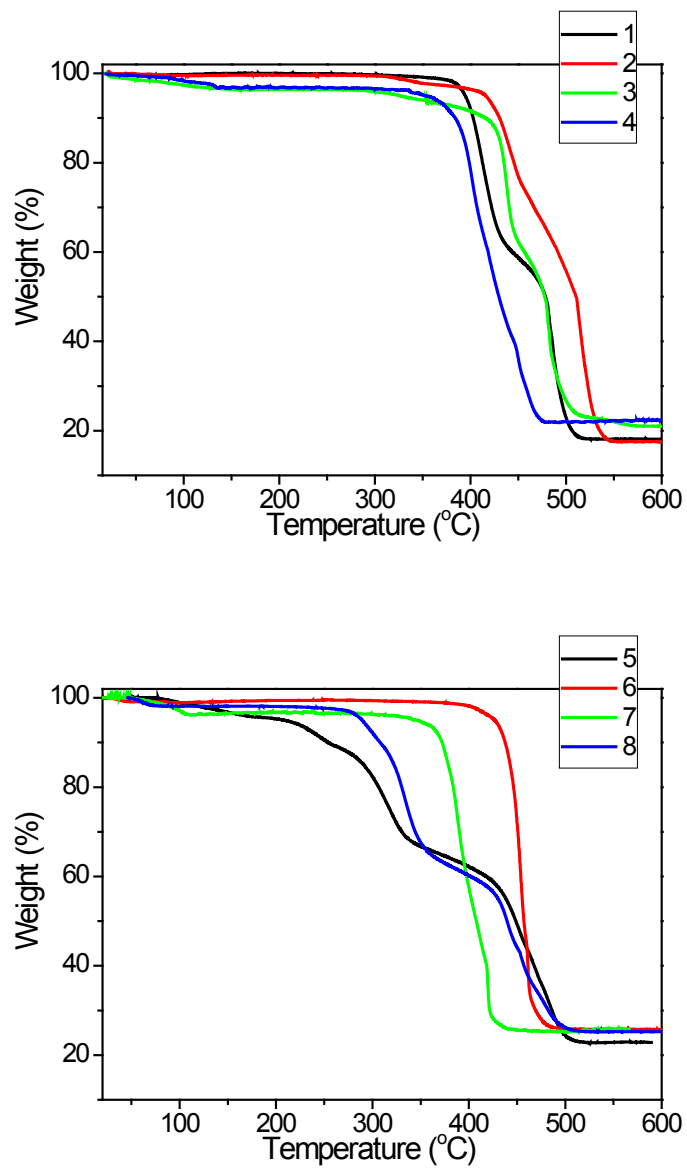

**Fig. S6.** TGA curves of compounds **1-8**.

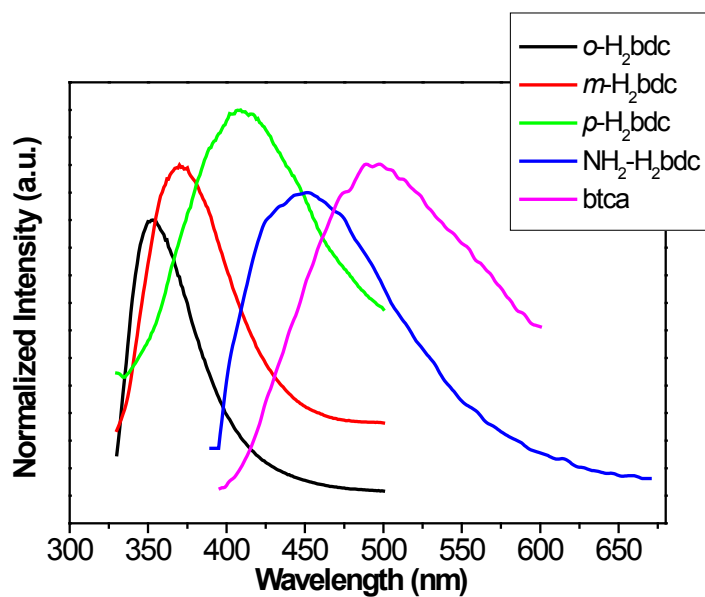

(a)

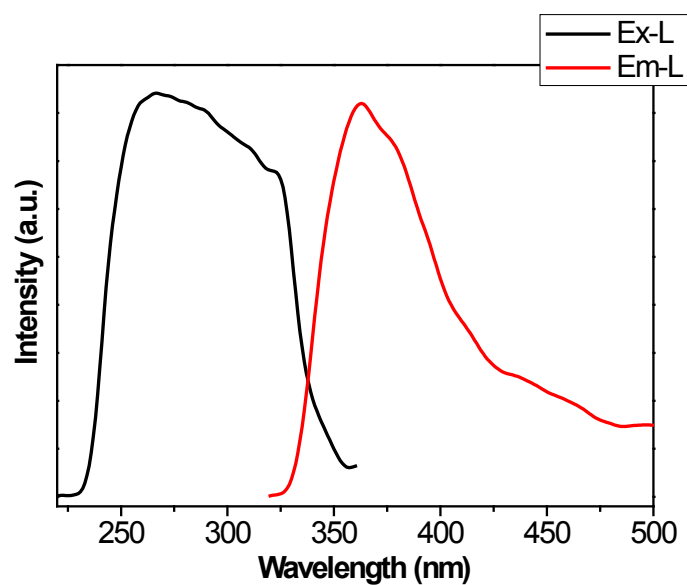

(b)

**Fig. S7.** (a) Solid-state emission spectra of free *o*-H<sub>2</sub>bdc, *m*-H<sub>2</sub>bdc, *p*-H<sub>2</sub>bdc, H<sub>4</sub>btec ligands at room temperature. (b) The excitation and emission spectra of L ligand at room temperature.
